# Supplementary material for: Fermentation, Identification, and Antioxidant Activity of Saponins Produced by a Wild Ginseng Endophytic Fungus Umbelopsis dimorpha Strain NSJG
Source: MDPI journal article supplement (doi:10.3390/fermentation10010009), 2023-12-21
Supplement: s1 [file s1]

**Table S1.** Glycosyl types of protopanaxadiol (PPD) saponins

| <b>Ginsenoside types</b> | <b>R1 persad</b> | <b>R2 persad</b>        | <b>R3<br/>persad</b> | <b>Molecular<br/>formula</b>                    |
|--------------------------|------------------|-------------------------|----------------------|-------------------------------------------------|
| Ginsenoside F2           | -Glc             | -Glc                    | -OH                  | C <sub>42</sub> H <sub>72</sub> O <sub>15</sub> |
| Ginsenoside Rb3          | -Glc2-1Glc       | -Glc6-1Xy1              | -OH                  | C <sub>53</sub> H <sub>90</sub> O <sub>22</sub> |
| Ginsenoside Ra1          | -Glc2-1Glc6-Mal  | -Glc6-1Ara(p)4-<br>1Xy1 | -OH                  | C <sub>58</sub> H <sub>98</sub> O <sub>26</sub> |
| Ginsenoside Ra2          | -Glc2-1Glc6-Mal  | -Glc6-1Ara(f)4-1Xy1     | -OH                  | C <sub>58</sub> H <sub>98</sub> O <sub>26</sub> |
| (20S)-Ginsenoside Rg3    | -Glc2-1Glc       | -H:20(S)                | -OH                  | C <sub>42</sub> H <sub>72</sub> O <sub>13</sub> |
| (20R)-GinsenosideRg3     | -Glc2-1Glc       | -H:20(R)                | -OH                  | C <sub>42</sub> H <sub>72</sub> O <sub>13</sub> |
| (20S)-GinsenosideRg3     | -Glc             | -H:20(S)                | -OH                  | C <sub>36</sub> H <sub>62</sub> O <sub>8</sub>  |
| (20R)-GinsenosideRh2     | -Glc             | -H:20(R)                | -OH                  | C <sub>36</sub> H <sub>62</sub> O <sub>8</sub>  |
| Ginsenoside Rs1          | -Glc2-1Glc6-Ac   | -Glc6-1Ara(p)           | -OH                  | C <sub>55</sub> H <sub>92</sub> O <sub>23</sub> |
| Ginsenoside Rd           | -Glc2-1Glc       | -Glc                    | -OH                  | C <sub>48</sub> H <sub>82</sub> O <sub>18</sub> |
| Ginsenoside Rb2          | -Glc2-1Glc       | -Glc6-1Ara(p)           | -OH                  | C <sub>53</sub> H <sub>90</sub> O <sub>22</sub> |
| Ginsenoside Rb1          | -Glc2-1Glc       | -Glc6-1Xy1              | -OH                  | C <sub>53</sub> H <sub>90</sub> O <sub>22</sub> |
| Ginsenoside Rc           | -Glc2-1Glc       | -Glc6-1Ara(f)           | -OH                  | C <sub>53</sub> H <sub>90</sub> O <sub>22</sub> |
| Ginsenoside XVII         | -Glc             | -Glc6-1Glc              | -OH                  | C <sub>48</sub> H <sub>82</sub> O <sub>20</sub> |
| Noto-ginsenoside Fe      | -Glc             | -Glc6-1Ara(f)           | -OH                  | C <sub>47</sub> H <sub>80</sub> O <sub>17</sub> |

**Table S2.** Glycosyl types of protopanaxatriol (PPT) saponins

| Ginsenoside types      | R1 perssad | R2 perssad    | R3 perssad | Molecular formula                               |
|------------------------|------------|---------------|------------|-------------------------------------------------|
| Ginsenoside F1         | -H         | -Glc          | -H         | C <sub>36</sub> H <sub>62</sub> O <sub>9</sub>  |
| Ginsenoside F3         | -H         | -Glc6-1Ara(p) | -H         | C <sub>53</sub> H <sub>92</sub> O <sub>24</sub> |
| Ginsenoside Ia         | -H         | -Glc          | -Glc       | C <sub>42</sub> H <sub>72</sub> O <sub>14</sub> |
| Ginsenoside Re         | -Glc2-1Rha | -Glc          | -H         | C <sub>48</sub> H <sub>82</sub> O <sub>18</sub> |
| Ginsenoside Rg1        | -Glc       | -Glc          | -H         | C <sub>42</sub> H <sub>72</sub> O <sub>14</sub> |
| (20S)-Ginsenoside Rg2  | -Glc2-1Rha | -H:20(S)      | -H         | C <sub>42</sub> H <sub>72</sub> O <sub>13</sub> |
| (20R)-Ginsenoside Rg2  | -Glc2-1Rha | -H:20(R)      | -H         | C <sub>42</sub> H <sub>72</sub> O <sub>13</sub> |
| (20S)-Ginsenoside Rh1  | -Glc       | -H:20(S)      | -H         | C <sub>36</sub> H <sub>62</sub> O <sub>9</sub>  |
| (20R)-Ginsenoside Rh1  | -Glc       | -H:20(R)      | -H         | C <sub>36</sub> H <sub>62</sub> O <sub>9</sub>  |
| Vina-ginsenoside R1    | =O         | -H            | -OH        | C <sub>41</sub> H <sub>70</sub> O <sub>13</sub> |
| Pseudo-ginsenoside F11 | =O         | -H            | -OH        | C <sub>42</sub> H <sub>72</sub> O <sub>14</sub> |
